# Supplementary material for: Enhanced oxygen reduction of multi-Fe3O4@carbon core–shell electrocatalysts through a nanoparticle/polymer co-assembly strategy
Source: Royal Society of Chemistry journal article supplement (doi:10.1039/c7nr09185k), 2018-01-01
Supplement: c7nr09185k1.pdf [file c7nr09185k1.pdf]

Electronic Supplementary Material (ESI) for Nanoscale.  
This journal is © The Royal Society of Chemistry 2017

## Supporting Information

### Enhanced oxygen reduction of multi- $\text{Fe}_3\text{O}_4$ @carbon core-shell electrocatalysts through nanoparticle/polymer co-assembly strategy

Jing Zhao, Congling Li and Rui Liu\*

Ministry of Education Key Laboratory of Advanced Civil Engineering Materials,  
School of Materials Science and Engineering and Institute for Advanced Study,  
Tongji University, 201804, Shanghai, China, E-mail: ruiliu@tongji.edu.cn

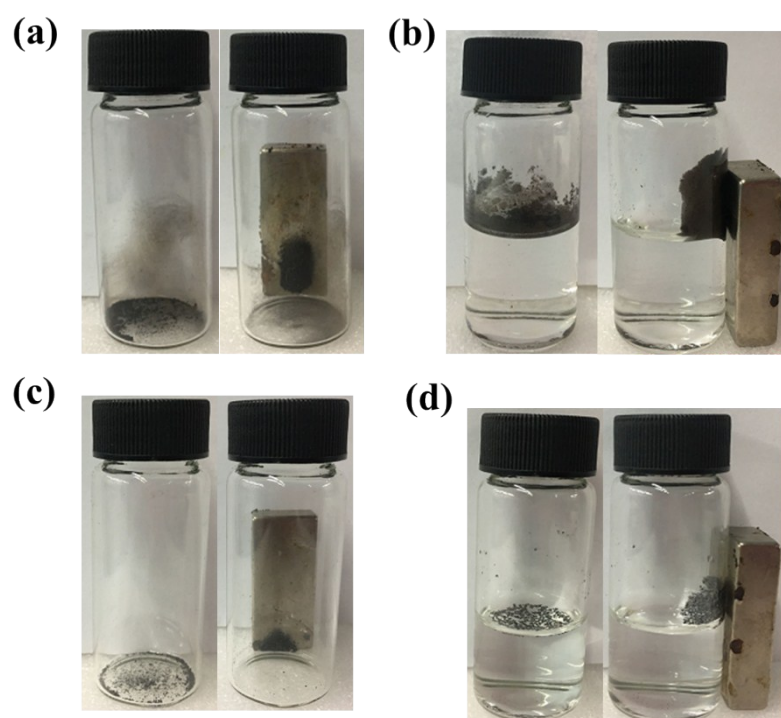

**Fig.S1** Digital graphs of (a)  $\text{Fe}_3\text{O}_4$  NPs, (b)  $\text{Fe}_3\text{O}_4$  NPs in water, (c)  $\text{mFe}_3\text{O}_4$ @C and (d)  $\text{mFe}_3\text{O}_4$ @C in water.

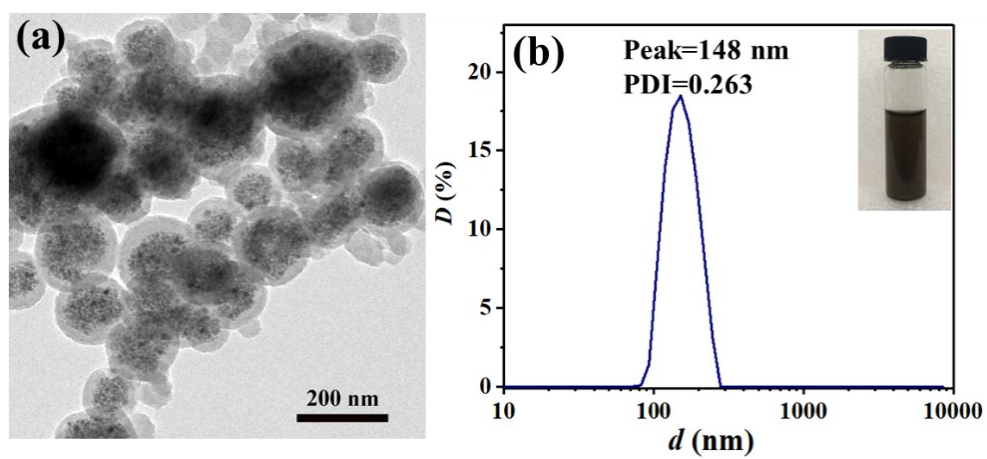

**Fig.S2** (a)TEM images and (b) DLS of  $m\text{Fe}_3\text{O}_4@\text{PS-}b\text{-PEO@PDA}$ .

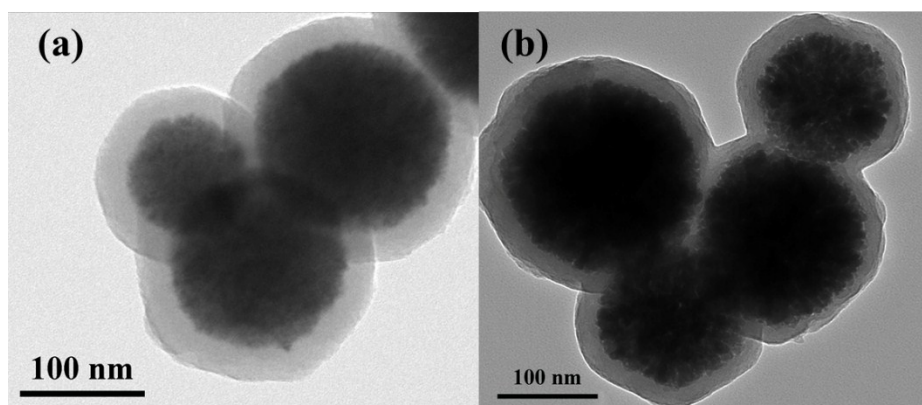

**Fig.S3** TEM images of (a)  $\text{Fe}_3\text{O}_4@\text{PDA}$  and (b)  $\text{Fe}_3\text{O}_4@\text{C}$ .

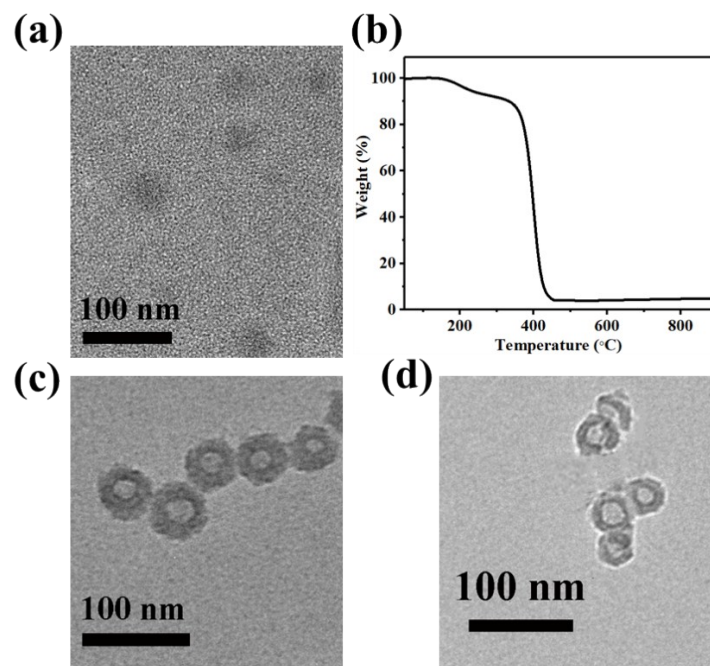

**Fig.S4**(a) TEM images of PS-*b*-PEO micelles and (b)TGA of PS-*b*-PEO micelles under nitrogen atmosphere, (c) and (d) TEM images of PS-*b*-PEO@PDA and derived hollow carbon shell.

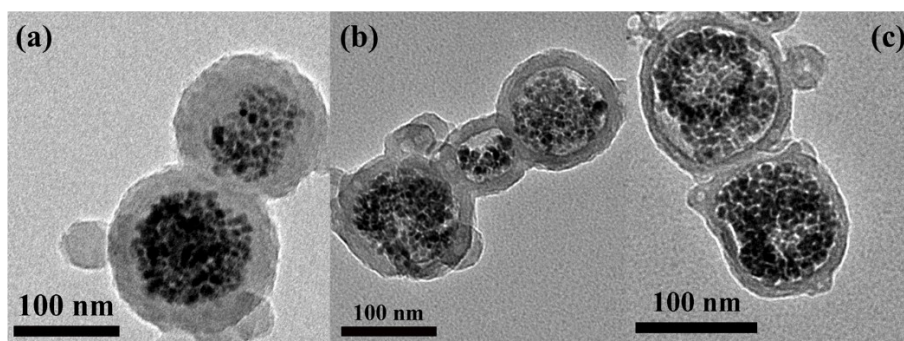

**Fig.S5** TEM images of  $m\text{Fe}_3\text{O}_4@\text{PS-}b\text{-PEO@PDA}$  carbonized at different temperatures at (a) 100 °C,(b) 300 °C and (c) 500 °C.

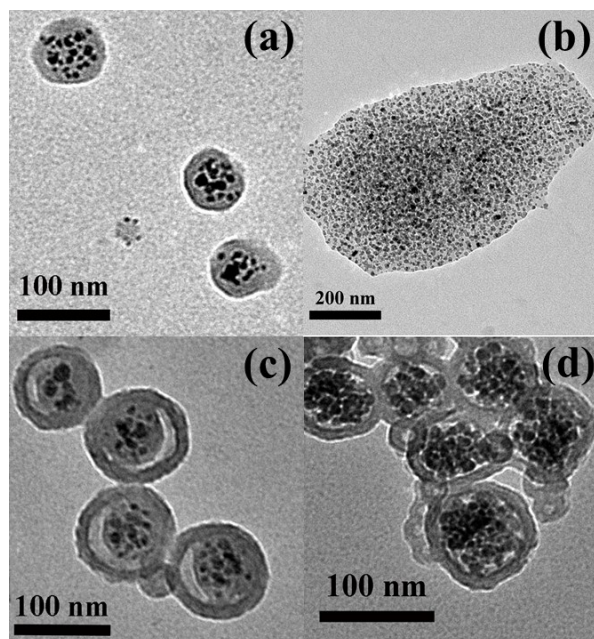

**Fig.S6** TEM images of  $\text{mFe}_3\text{O}_4@\text{PS-}b\text{-PEO}$  from initial mass ratio of  $\text{Fe}_3\text{O}_4/\text{PS-}b\text{-PEO}$  at (a) 0.3 and 10, (c)  $\text{mFe}_3\text{O}_4@\text{PS-}b\text{-PEO@PDA}$  and (d)  $\text{mFe}_3\text{O}_4@\text{C}$  prepared from initial mass ratio at 0.3 (denoted as  $\text{mFe}_3\text{O}_4@\text{C-s}$  for convenience).

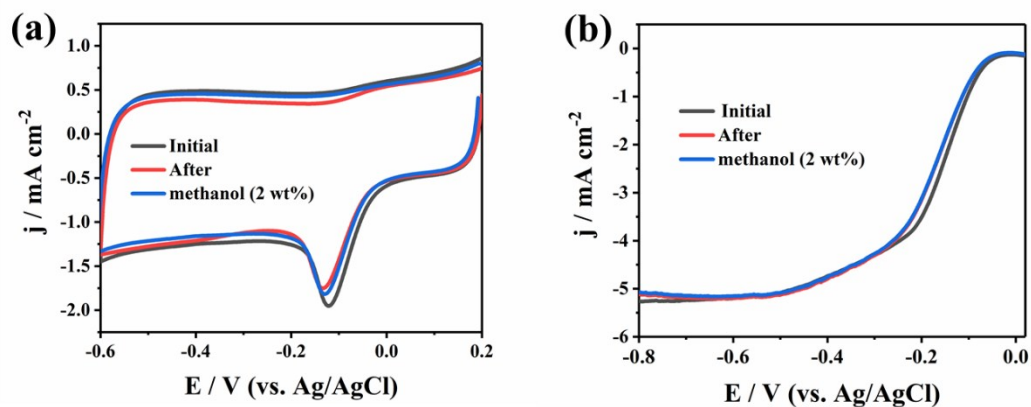

**Fig.S7** (a) CV curves of  $\text{mFe}_3\text{O}_4@\text{C}$  and Pt/C after circulation and in the presence of methanol at a scan rate of  $10 \text{ mV s}^{-1}$  in  $\text{O}_2$ -saturated. (b) LSV curves of  $\text{mFe}_3\text{O}_4@\text{C}$  and Pt/C after circulation and in the presence of methanol at a rotation rate of 1600 rpm.
